# Supplementary material
Source: Springer Nature journal article supplement (https://www.springermedizin.de/resource/supplementary/12978_2013_272_MOESM2_ESM.pdf/9602396)
Supplement: MOESM2 [file 9602396]

| Phase                                                                                                                                                                                                           | Procedure                                                                                                                                                                      | Product                                                                                                                     |
|-----------------------------------------------------------------------------------------------------------------------------------------------------------------------------------------------------------------|--------------------------------------------------------------------------------------------------------------------------------------------------------------------------------|-----------------------------------------------------------------------------------------------------------------------------|
| <div style="border: 1px solid black; padding: 5px; text-align: center;">Quantitative<br/>Data Collection</div>                                                                                                  | <ul style="list-style-type: none"> <li>• population-based cross-sectional survey (N=770)</li> </ul>                                                                            | <ul style="list-style-type: none"> <li>• Numeric data</li> </ul>                                                            |
| <div style="text-align: center;">↓</div> <div style="border: 1px solid black; padding: 5px; text-align: center;">Quantitative<br/>Data Analysis</div>                                                           | <ul style="list-style-type: none"> <li>• Data screening (frequencies, percent, univariate, multivariate)</li> <li>• SPSS software v.16</li> </ul>                              | <ul style="list-style-type: none"> <li>• Descriptive statistics, linearity, multivariate outliers</li> </ul>                |
| <div style="text-align: center;">↓</div> <div style="border: 1px solid black; border-radius: 50%; padding: 10px; text-align: center;">Case Selection;<br/>Interview<br/>Protocol<br/>Development</div>          | <ul style="list-style-type: none"> <li>• Purposefully selecting Based on typical response and maximal variation principle</li> <li>• Developing interview questions</li> </ul> | <ul style="list-style-type: none"> <li>• Cases (?)</li> <li>• Interview protocol</li> </ul>                                 |
| <div style="text-align: center;">↓</div> <div style="border: 1px solid black; padding: 5px; text-align: center;">Qualitative<br/>Data Collection</div>                                                          | <ul style="list-style-type: none"> <li>• Individual in-depth with participants (until saturating data)</li> </ul>                                                              | <ul style="list-style-type: none"> <li>• Text data (interview transcripts)</li> </ul>                                       |
| <div style="text-align: center;">↓</div> <div style="border: 1px solid black; padding: 5px; text-align: center;">Qualitative<br/>Data Analysis</div>                                                            | <ul style="list-style-type: none"> <li>• Coding and thematic analysis</li> <li>• Within-case and across-case theme development</li> </ul>                                      | <ul style="list-style-type: none"> <li>• Codes and themes</li> <li>• Similar and different themes and categories</li> </ul> |
| <div style="text-align: center;">↓</div> <div style="border: 1px solid black; border-radius: 50%; padding: 10px; text-align: center;">Integration of the<br/>Quantitative and<br/>Qualitative<br/>Results</div> | <ul style="list-style-type: none"> <li>• Interpretation and explanation of the Quantitative and Qualitative Results</li> </ul>                                                 | <ul style="list-style-type: none"> <li>• Discussion</li> <li>• Implications</li> <li>• Future research</li> </ul>           |
